# Supplementary material for: DNA binding and oxidative DNA cleavage activity of (μ-oxo)diiron(iii) complexes in visible light
Source: Royal Society of Chemistry journal article supplement (doi:10.1039/b815215b), 2008-12-17
Supplement: b815215b.pdf [file b815215b.pdf]

**DNA binding and oxidative DNA cleavage activity of ( $\mu$ -oxo)diiron(III) complexes in visible light**

Mithun Roy, Ramkumar Santhanagopal and Akhil R. Chakravarty\*

*Department of Inorganic and Physical Chemistry, Indian Institute of Science, Bangalore 560012, India.*

Fax: +91-80-23600683; E-mail: [arc@ipc.iisc.ernet.in](mailto:arc@ipc.iisc.ernet.in)

Electronic Supplementary Information

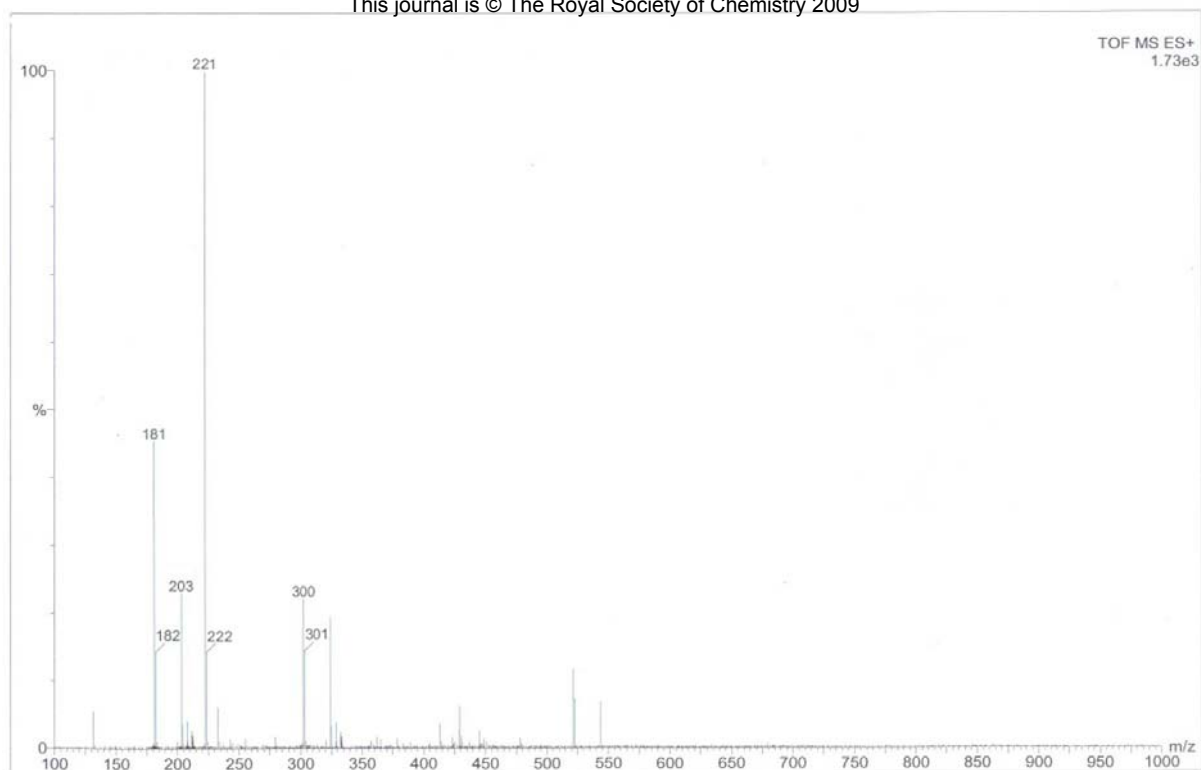

**Fig. S1.** ESI-MS spectrum of complex **1** in H<sub>2</sub>O showing the parent ion peak at m/z 221 (M-4ClO<sub>4</sub>)<sup>4+</sup>.

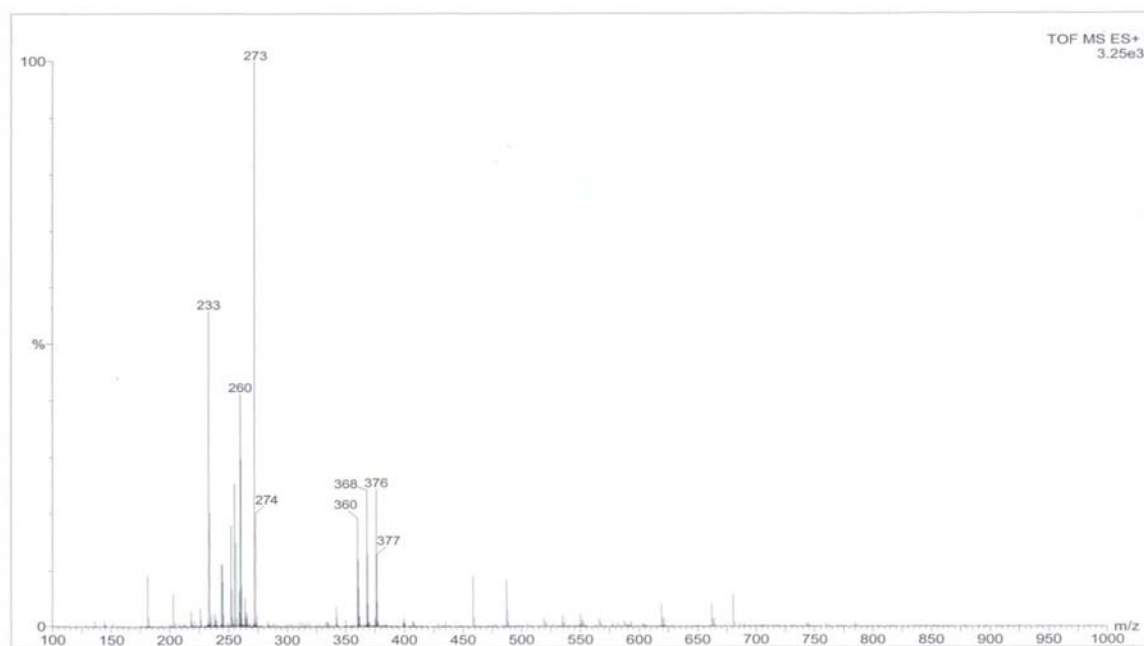

**Fig. S2.** ESI-MS spectrum of complex **2** in H<sub>2</sub>O showing the parent ion peak at m/z 273 (M-4ClO<sub>4</sub>)<sup>4+</sup>.

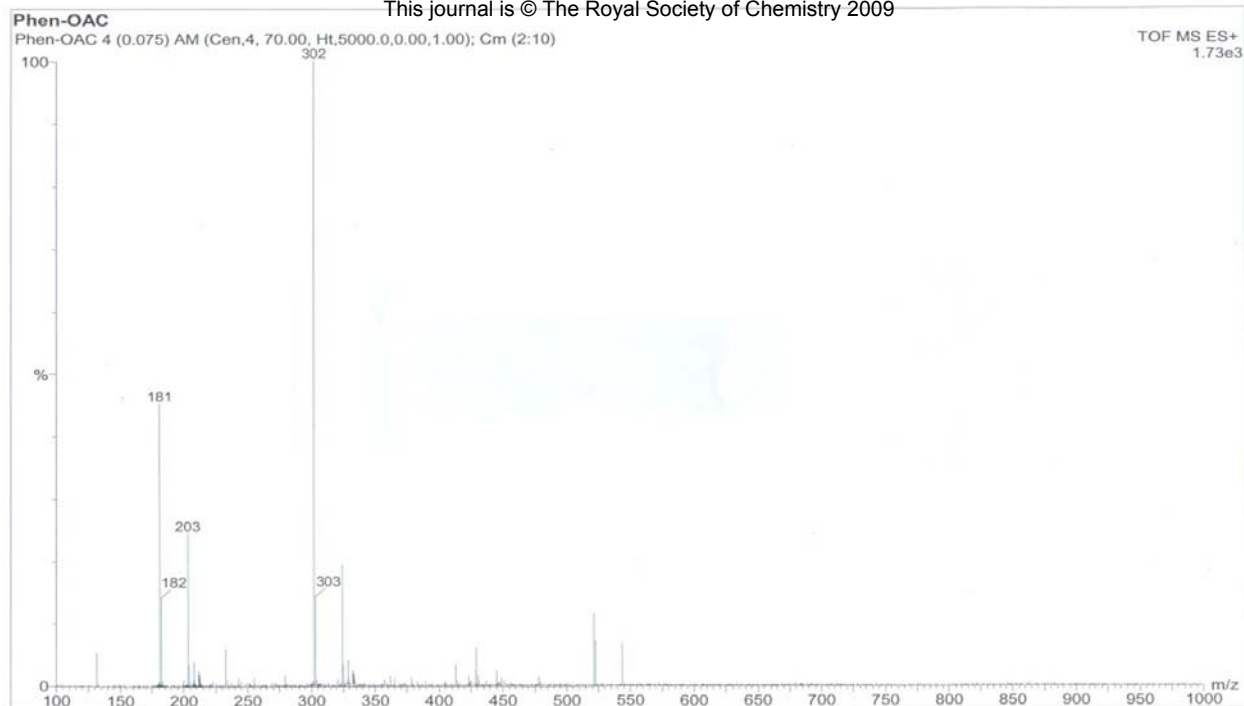

**Fig. S3.** ESI-MS spectrum of complex **3** in H<sub>2</sub>O showing the parent ion peak at m/z 302 (M-3ClO<sub>4</sub>)<sup>3+</sup>.

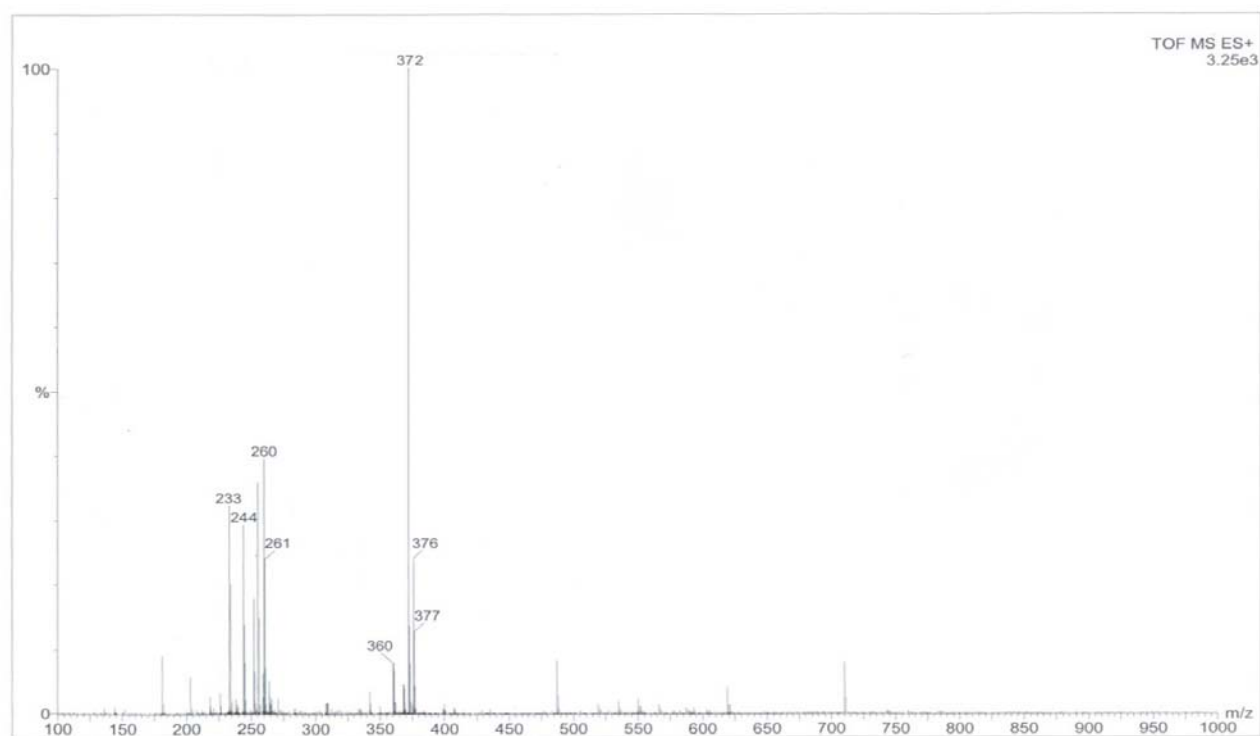

**Fig. S4.** ESI-MS spectrum of complex **4** in H<sub>2</sub>O showing the parent ion peak at m/z 372 (M-3ClO<sub>4</sub>)<sup>3+</sup>.

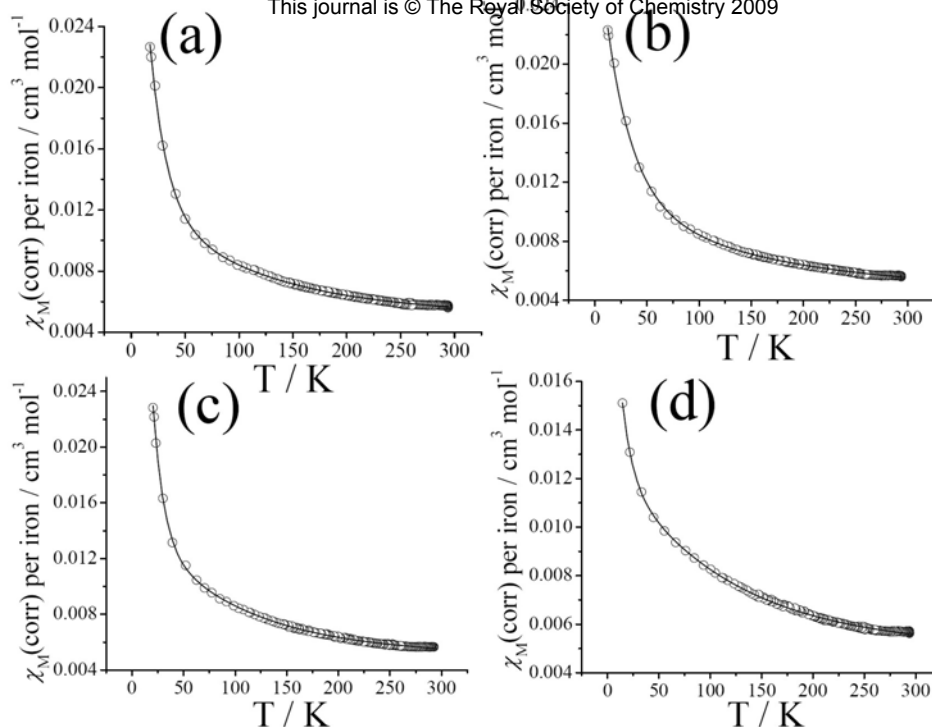

**Fig. S5.** Temperature dependence (295-18 K) of the molar magnetic susceptibility per iron(III) (circle) of the complexes **1** (a), **2** (b), **3** (c) and **4** (d). The solid lines represent the theoretical fits using the equation described in the text.

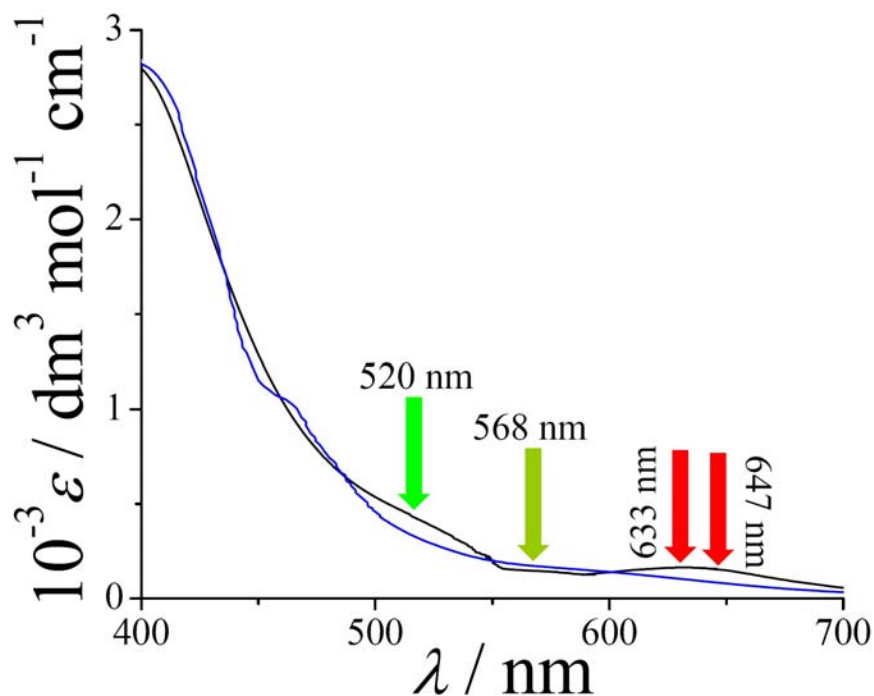

**Fig. S6.** The electronic spectra of the complexes **1**(—) and **3**(—) in Tris-HCl buffer showing the LMCT bands. The arrows indicate the wavelength of excitation used in the DNA cleavage experiment.

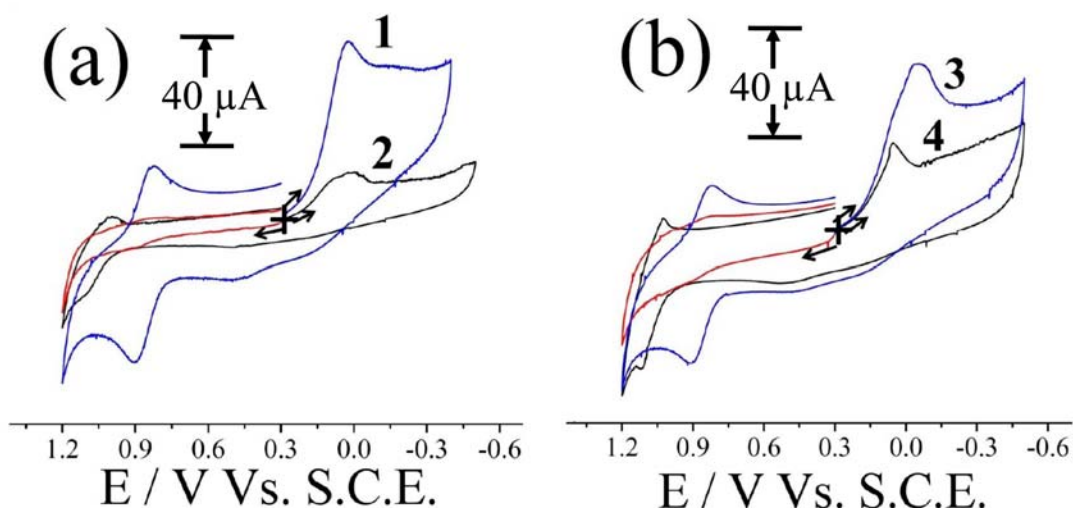

**Fig. S7.** The cyclic voltammetric responses of the complexes **1** and **2** (a) and **3** and **4** (b) in H<sub>2</sub>O-0.1M KCl at a scan rate of 50 mV s<sup>-1</sup> with reference to S.C.E. All the complexes display irreversible cyclic voltammetric response at ~100 mV with no anodic counterpart. The reversible voltammogram near 0.9 V is due to the formation of the binary complex of iron(II), viz. [Fe(phen)<sub>3</sub>]<sup>2+</sup> or [Fe(dpq)<sub>3</sub>]<sup>2+</sup> from degradation of diiron species. This voltammogram is not visible during only anodic scan (red line).

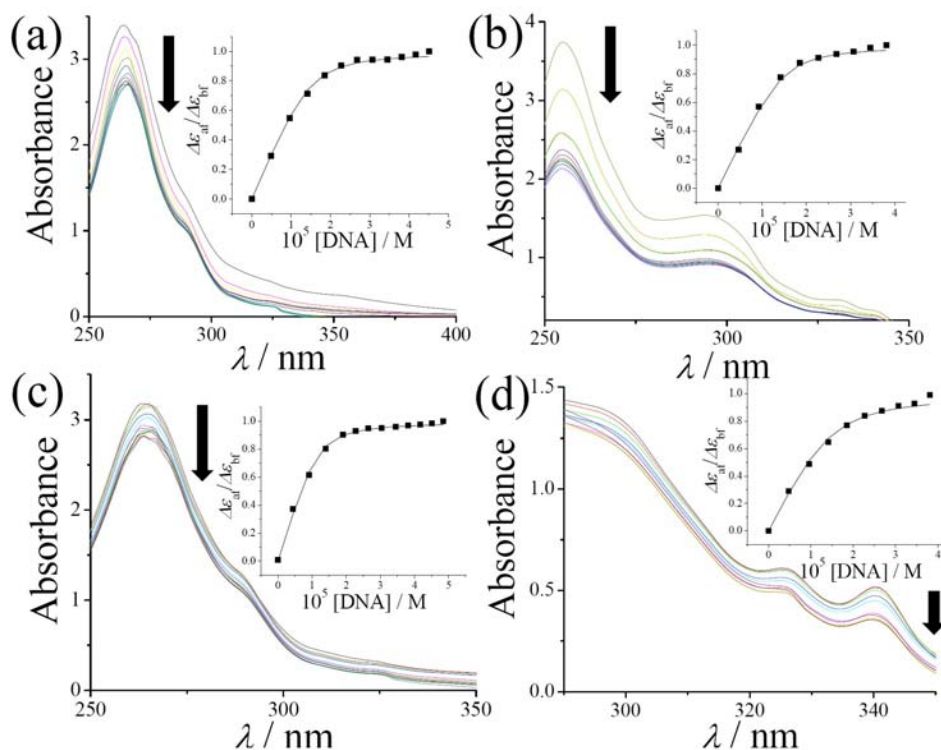

**Fig. S8.** Spectral traces showing the effect of addition of CT DNA (250 μM NP) to a 30 μM complex **1** (a), **2** (b), **3** (c) and **4** (d) in Tris-HCl buffer (pH 7.2) with the insets showing the MvH plots ( $\Delta\epsilon_{af}/\Delta\epsilon_{bf}$  vs. [DNA]). The experimental details are given in the text.

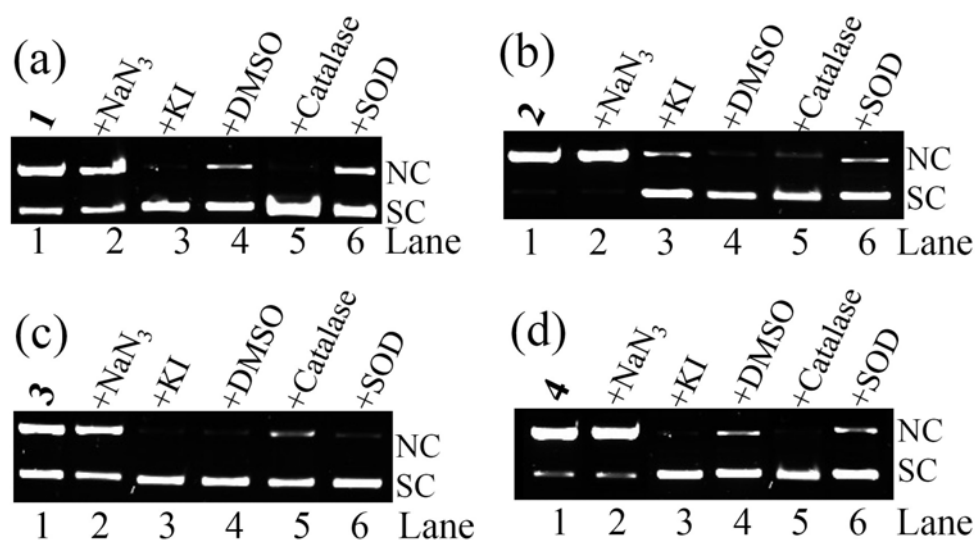

| Complex + MPA<br>(Fig.) | %NC form (Chemical Nuclease Activity) |                    |                 |                   |                       |                  |
|-------------------------|---------------------------------------|--------------------|-----------------|-------------------|-----------------------|------------------|
|                         | Complex<br>+ MPA                      | + $\text{NaN}_3^a$ | + $\text{KI}^b$ | + $\text{DMSO}^c$ | + $\text{Catalase}^d$ | + $\text{SOD}^e$ |
| <b>1</b> + MPA (S9a)    | 63                                    | 60                 | 9               | 19                | 11                    | 27               |
| <b>2</b> + MPA (S9b)    | 96                                    | 94                 | 25              | 8                 | 8                     | 18               |
| <b>3</b> + MPA (S9c)    | 53                                    | 55                 | 6               | 5                 | 15                    | 7                |
| <b>4</b> + MPA (S9d)    | 84                                    | 80                 | 14              | 18                | 7                     | 18               |

**Fig. S9.** The gel electrophoresis diagram showing the mechanistic aspects of chemical oxidation of SC pUC19 DNA (0.2  $\mu\text{g}$ , 30  $\mu\text{M}$ ) by the complexes (**1** – **4**) in the presence of the various additives in 50 mM Tris-HCl/NaCl buffer (pH 7.2) in the presence of 3-mercapto propionic acid (MPA) as a reducing agent. The percent of cleavage in the presence of various additives are tabulated. Complex concentration = 30  $\mu\text{M}$ . The %NC for DNA control is ~3%. <sup>a</sup> $[\text{NaN}_3]$  = 500  $\mu\text{M}$ . <sup>b</sup> $[\text{KI}]$  = 500  $\mu\text{M}$ . <sup>c</sup> $\text{DMSO}$  = 6  $\mu\text{L}$ . <sup>d</sup> $\text{SOD}$  = 2 units. <sup>e</sup> $\text{Catalase}$  = 2 units.

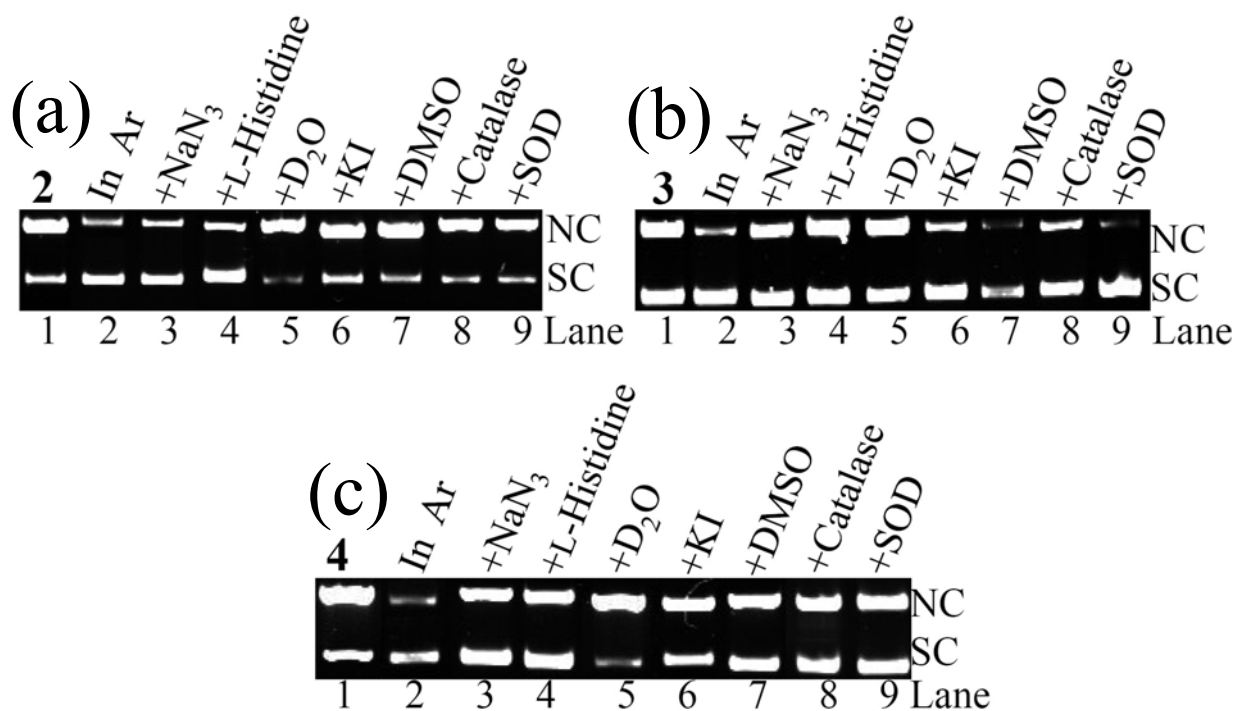

| Complex<br>(Fig.) | % NC form (photo-irradiation at 365 nm) |                    |                            |                          |                 |          |                     |                         |                    |
|-------------------|-----------------------------------------|--------------------|----------------------------|--------------------------|-----------------|----------|---------------------|-------------------------|--------------------|
|                   | Complex                                 | + $\text{NaN}_3^a$ | + L-Histidine <sup>b</sup> | + $\text{D}_2\text{O}^c$ | + $\text{KI}^d$ | In Argon | + DMSO <sup>e</sup> | + Catalase <sup>f</sup> | + SOD <sup>g</sup> |
| 2 (S10a)          | 83                                      | 21                 | 17                         | 90                       | 84              | 24       | 85                  | 87                      | 80                 |
| 3 (S10b)          | 67                                      | 70                 | 72                         | 68                       | 10              | 20       | 15                  | 15                      | 18                 |
| 4 (S10c)          | 96                                      | 48                 | 53                         | 91                       | 64              | 25       | 50                  | 56                      | 71                 |

**Figure S10.** The gel electrophoresis diagram showing the mechanistic aspects of photocleavage of SC pUC19 DNA (0.2  $\mu\text{g}$ , 30  $\mu\text{M}$ ) by the complexes in the presence of the various additives in 50 mM Tris-HCl/NaCl buffer (pH 7.2) on photoexposure of UV light of 365 nm. The percent of cleavage in the presence of various additives are tabulated. Complex concentration = 5.5  $\mu\text{M}$ . The exposure time for the complexes is 2 h. The %NC for DNA control is ~2%. <sup>a</sup>[ $\text{NaN}_3$ ] = 200  $\mu\text{M}$ . <sup>b</sup>[L-His] = 200  $\mu\text{M}$ . <sup>c</sup> $\text{D}_2\text{O}$  = 16  $\mu\text{L}$ . <sup>d</sup>[KI] = 200  $\mu\text{M}$ . <sup>e</sup>DMSO = 6  $\mu\text{L}$ . <sup>f</sup>SOD = 2 units. <sup>g</sup>Catalase = 2 units.

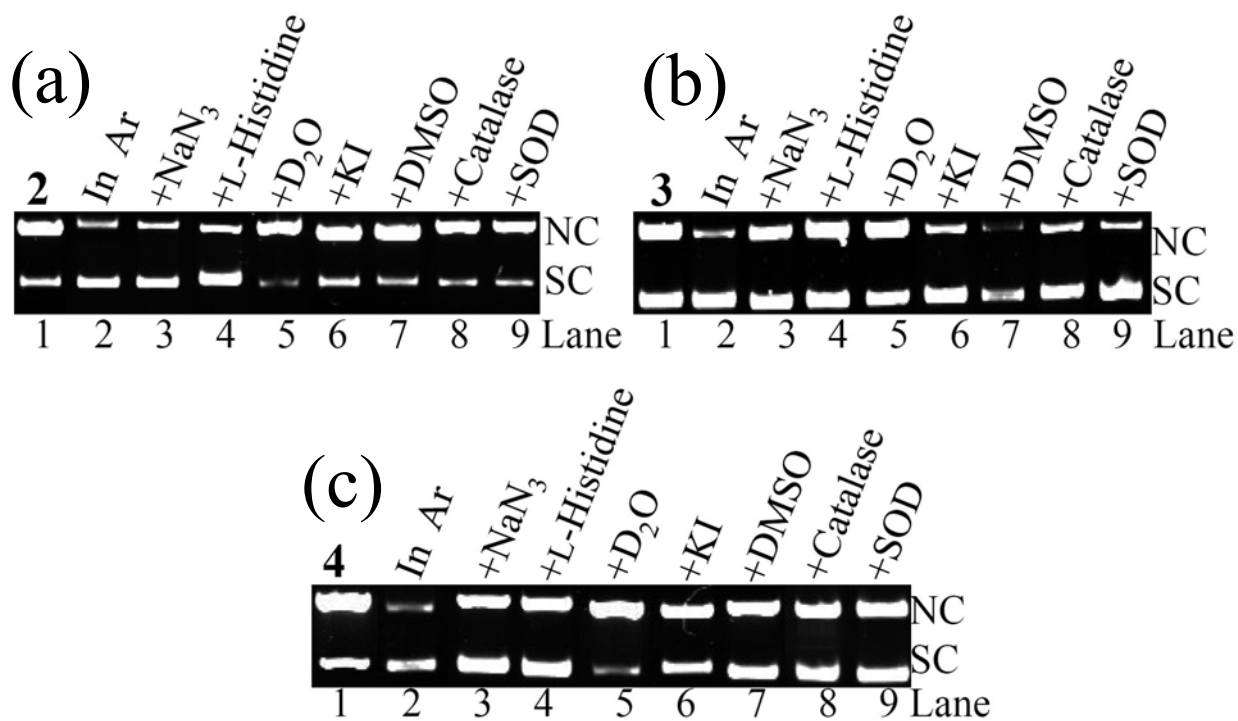

| Complex (Fig.)  | % NC form (photo-irradiation in visible light) |          |                             |                           |                                   |                  |                    |                        |                   |
|-----------------|------------------------------------------------|----------|-----------------------------|---------------------------|-----------------------------------|------------------|--------------------|------------------------|-------------------|
|                 | Complex                                        | In Argon | + $\text{NaN}_3^{\text{a}}$ | +L-Histidine <sup>b</sup> | + $\text{D}_2\text{O}^{\text{c}}$ | +KI <sup>d</sup> | +DMSO <sup>e</sup> | +Catalase <sup>f</sup> | +SOD <sup>g</sup> |
| <b>2</b> (S11a) | 78                                             | 26       | 31                          | 25                        | 88                                | 80               | 76                 | 80                     | 78                |
| <b>3</b> (S11b) | 70                                             | 22       | 68                          | 72                        | 74                                | 21               | 15                 | 19                     | 22                |
| <b>4</b> (S11c) | 88                                             | 25       | 56                          | 57                        | 95                                | 49               | 52                 | 47                     | 53                |

**Figure S11.** The gel electrophoresis diagram showing the mechanistic aspects of the photocleavage of SC pUC19 DNA (0.2  $\mu\text{g}$ , 30  $\mu\text{M}$ ) by the complexes in the presence of the various additives in 50 mM Tris-HCl/NaCl buffer (pH 7.2) on irradiation with light of  $\lambda = 520$  nm for **2** and **4**,  $\lambda = 647$  nm for **3**. [complex] = 60  $\mu\text{M}$ . The exposure time is 2 h. <sup>a</sup>[ $\text{NaN}_3$ ] = 500  $\mu\text{M}$ , <sup>b</sup>[L-His] = 500  $\mu\text{M}$ , <sup>c</sup> $\text{D}_2\text{O}$  = 16  $\mu\text{M}$ , <sup>d</sup>[KI] = 500  $\mu\text{M}$ , <sup>e</sup>DMSO = 6  $\mu\text{L}$ , <sup>f</sup>Catalase = 4 units. <sup>g</sup>SOD = 4 units.
